# Supplementary material for: Phytotoxic dioxolanones are potential virulence factors in the infection process of Guignardia bidwellii
Source: Springer Nature journal article supplement (doi:10.1038/s41598-017-09157-6), 2017-08-15
Supplement: MOESM1 [file 41598_2017_9157_MOESM1_ESM.pdf]

## Supporting information

### **Phytotoxic dioxolanones are potential virulence factors in the infection process of *Guignardia bidwellii***

Buckel, Iris; Andernach, Lars; Schüffler, Anja; Piepenbring, Meike; Opatz, Till; Thines,  
Eckhard

## Toxin detection *in planta*

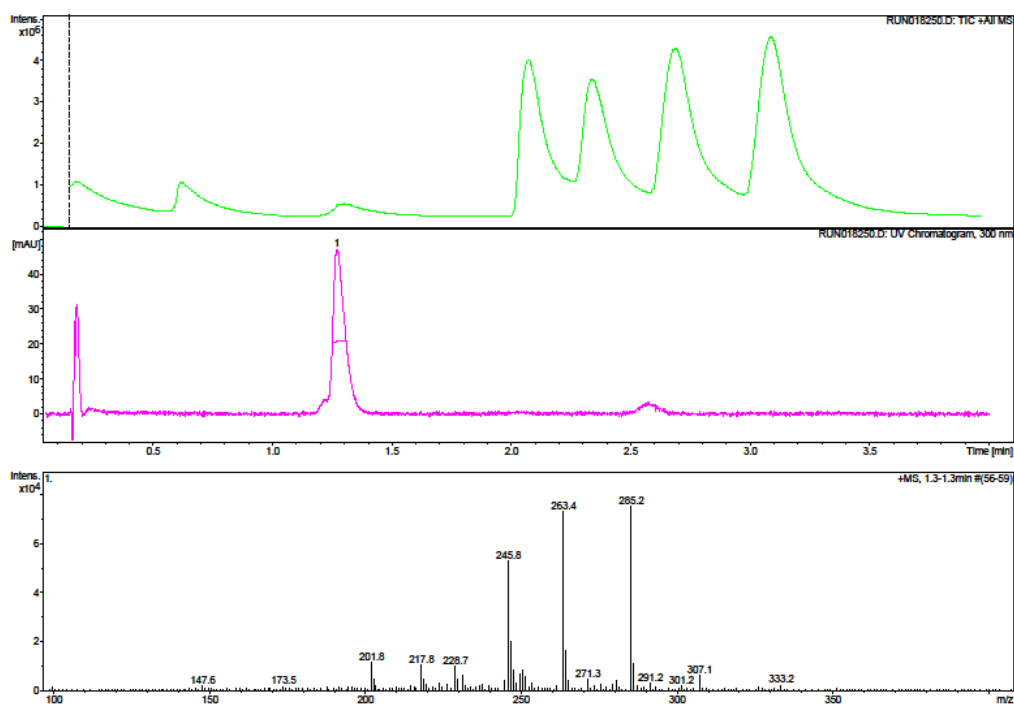

**Fig. 1:** HPLC-ESIMS run data of the HPLC peak (retention time 8.7 min). (gradient: 70:30  $\rightarrow$  65:35 H<sub>2</sub>O/MeCN in 4 minutes, then in 2 minutes 65:35  $\rightarrow$  10:90 H<sub>2</sub>O/MeCN)

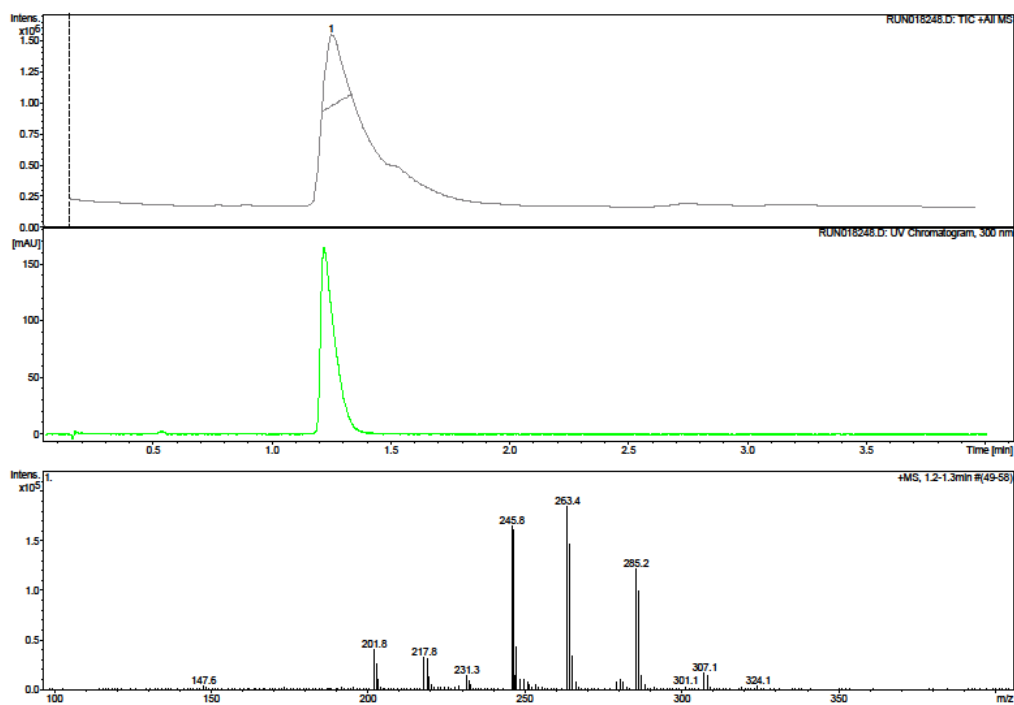

**Fig 2:** HPLC-ESIMS data of isolated partially <sup>13</sup>C-labeled guignardic acid. (gradient: 70:30  $\rightarrow$  65:35 H<sub>2</sub>O/MeCN in 4 minutes, then in 2 minutes 65:35  $\rightarrow$  10:90 H<sub>2</sub>O/MeCN)

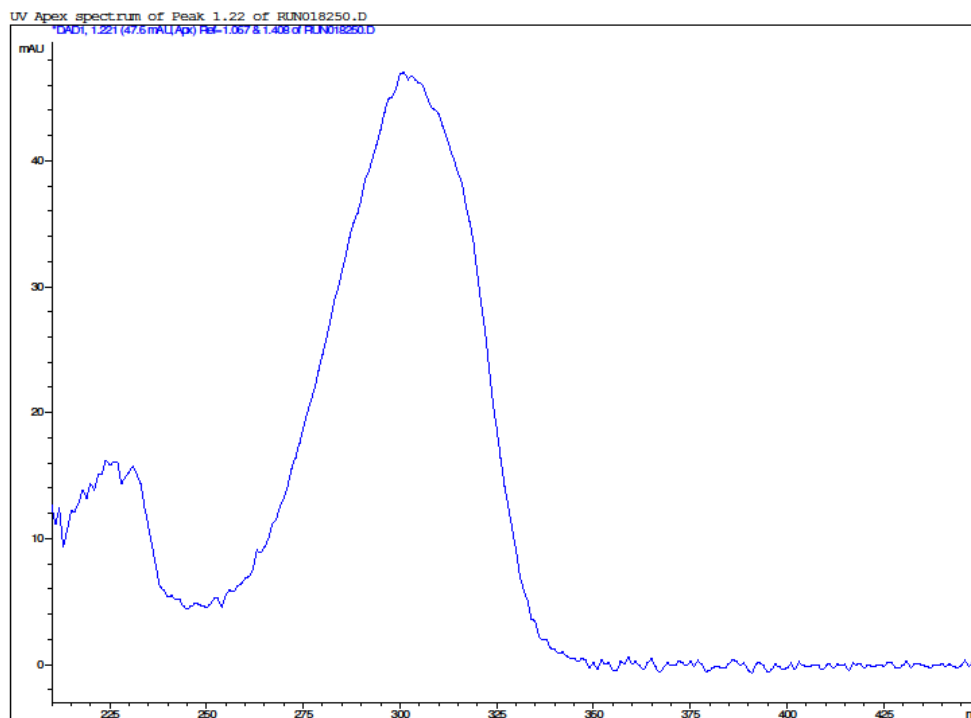

**Fig. 3:** UV spectrum at 1.3 minutes of the collected HPLC peak (retention time 8.7 minutes).

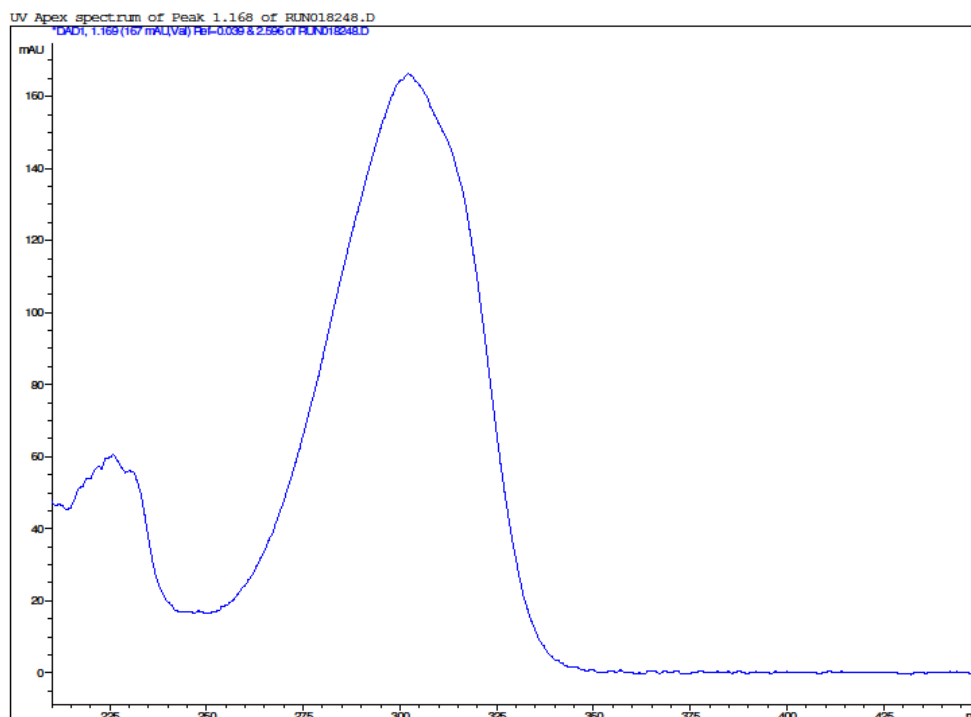

**Fig. 4:** UV spectrum at 1.3 minutes of isolated partially  $^{13}\text{C}$ -labeled guignardic acid.

## Elucidation of the precursor for the biosynthesis of phytotoxic dioxolanones

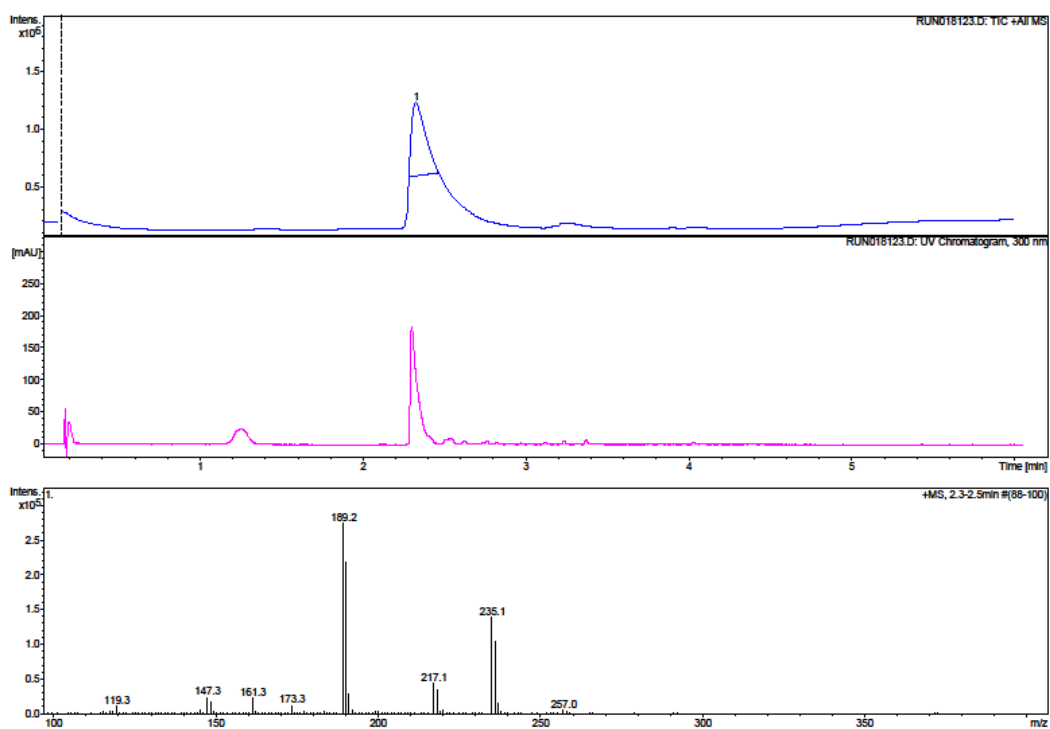

**Fig. 5:** HPLC-ESIMS data of isolated partially <sup>13</sup>C-labeled alaguignardic acid. (gradient: 90:10 → 10:90 H<sub>2</sub>O/MeCN in 4 minutes, then 2 minutes 10:90 H<sub>2</sub>O/MeCN)

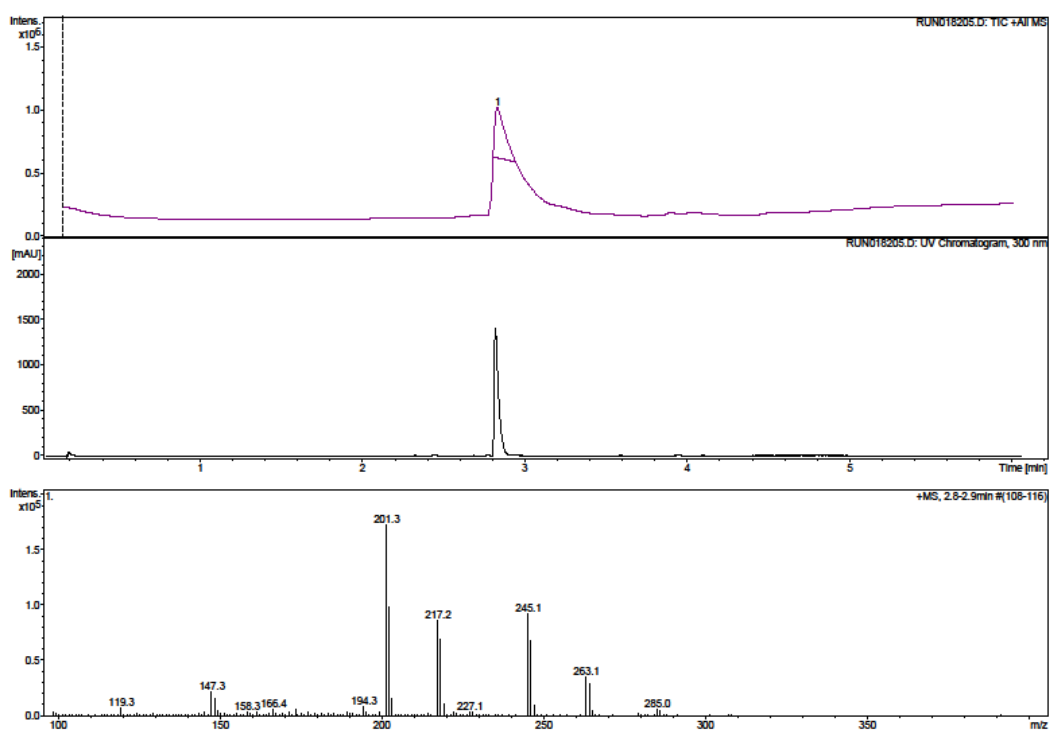

**Fig. 6:** HPLC-ESIMS data of isolated partially  $^{13}\text{C}$ -labeled guignardic acid. (gradient: 90:10  $\rightarrow$  10:90  $\text{H}_2\text{O}/\text{MeCN}$  in 4 minutes, then 2 minutes 10:90  $\text{H}_2\text{O}/\text{MeCN}$ )

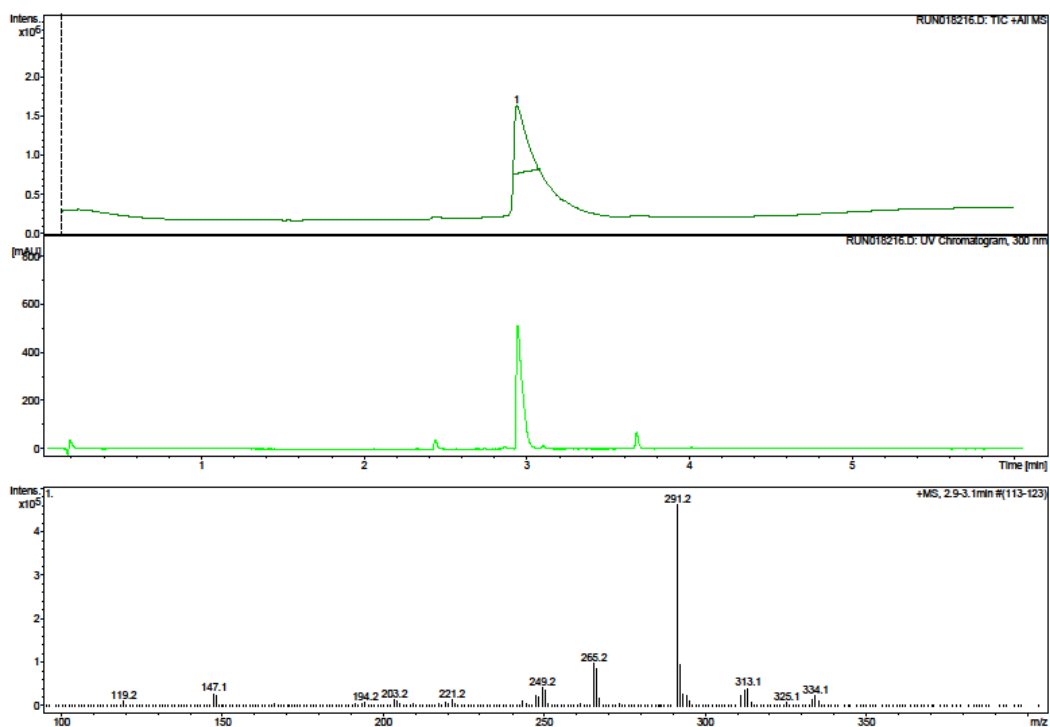

**Fig. 7:** HPLC-ESIMS data of isolated partially  $^{13}\text{C}$ -labeled phenguignardic acid. (gradient: 90:10  $\rightarrow$  10:90  $\text{H}_2\text{O}/\text{MeCN}$  in 4 minutes, then 2 minutes 10:90  $\text{H}_2\text{O}/\text{MeCN}$ )

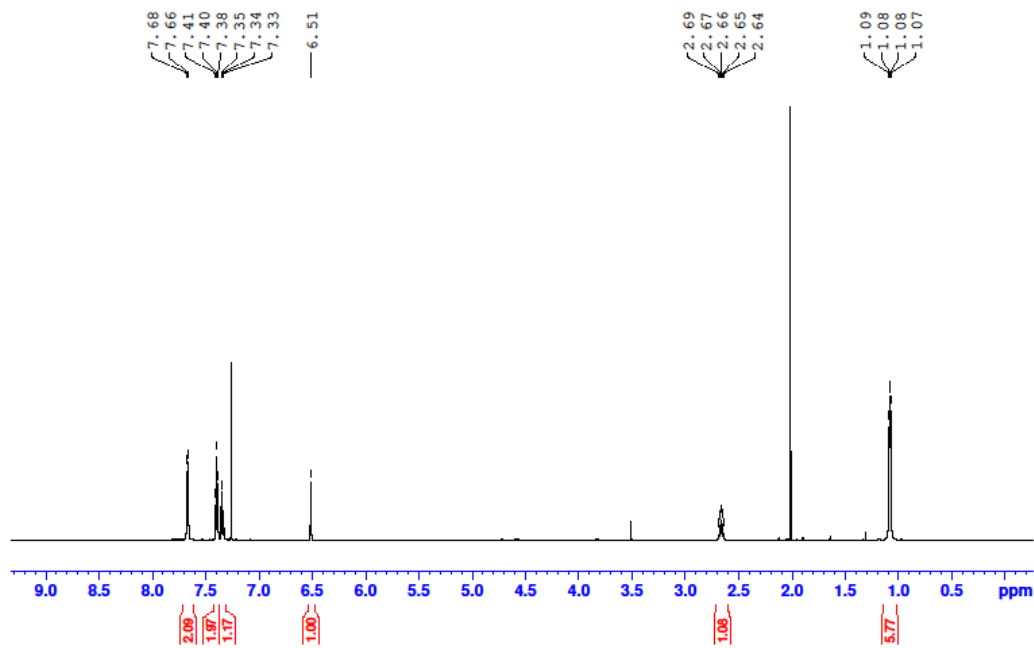

Fig. 8:  $^1\text{H}$ -NMR of partially  $^{13}\text{C}$  labeled guignardic acid (600 MHz,  $\text{CDCl}_3$ ).

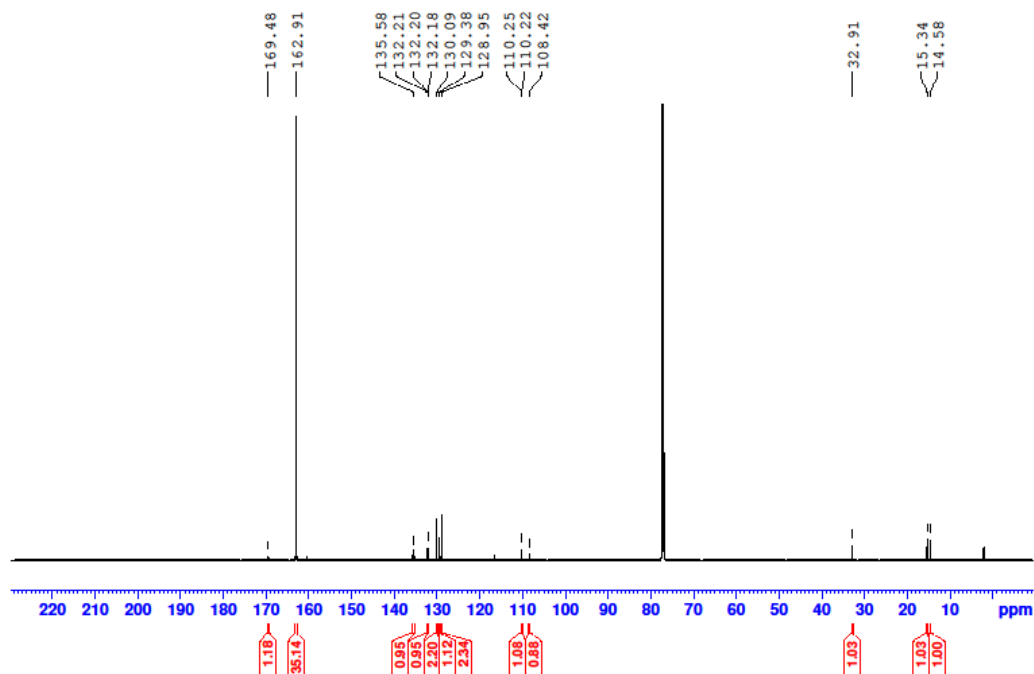

Fig. 9: Igated  $^{13}\text{C}$ -NMR of partially  $^{13}\text{C}$  labeled guignardic acid (151 MHz,  $\text{CDCl}_3$ ).

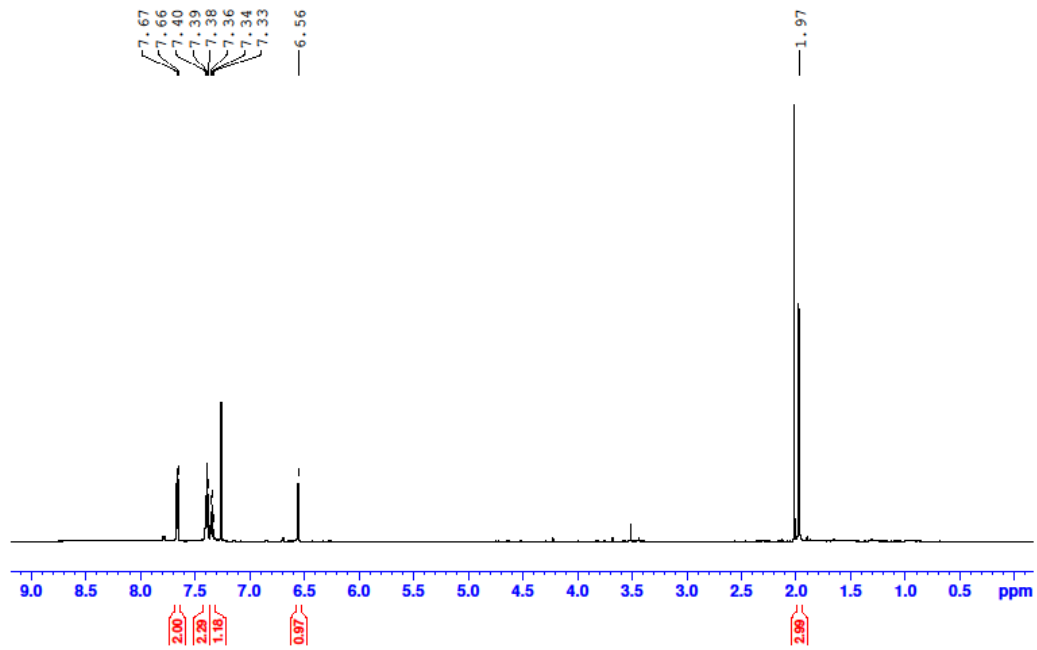

**Fig. 10:**  $^1\text{H}$ -NMR of partially  $^{13}\text{C}$  labeled alaguignardic acid (600 MHz,  $\text{CDCl}_3$ ).

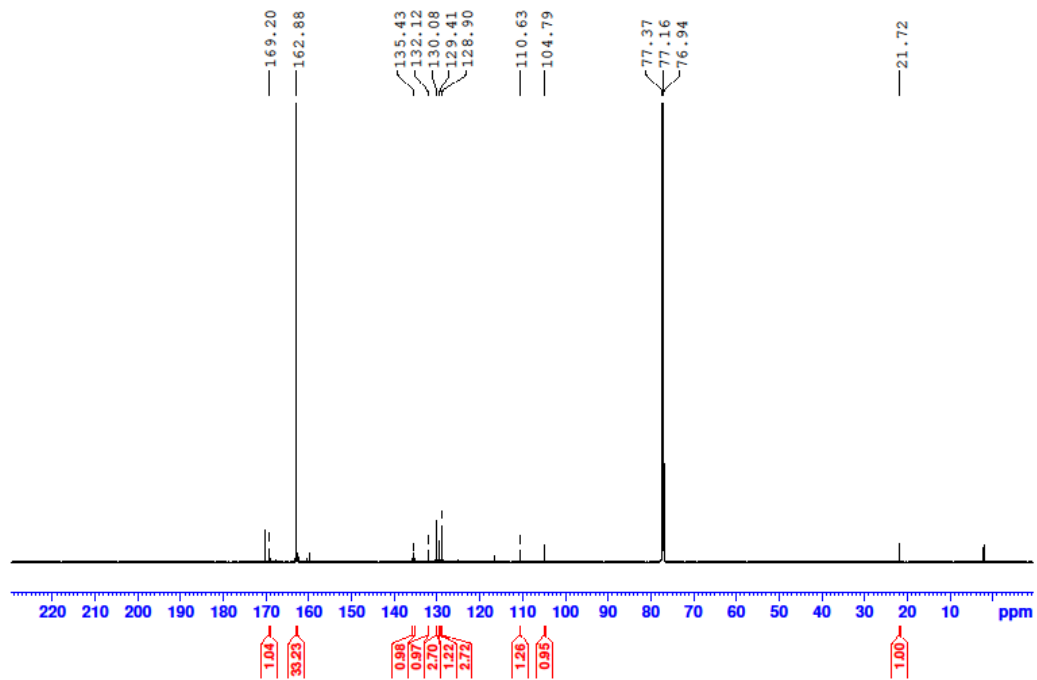

**Fig. 11:** gated  $^{13}\text{C}$ -NMR of partially  $^{13}\text{C}$  labeled alaguignardic acid (151 MHz,  $\text{CDCl}_3$ ).

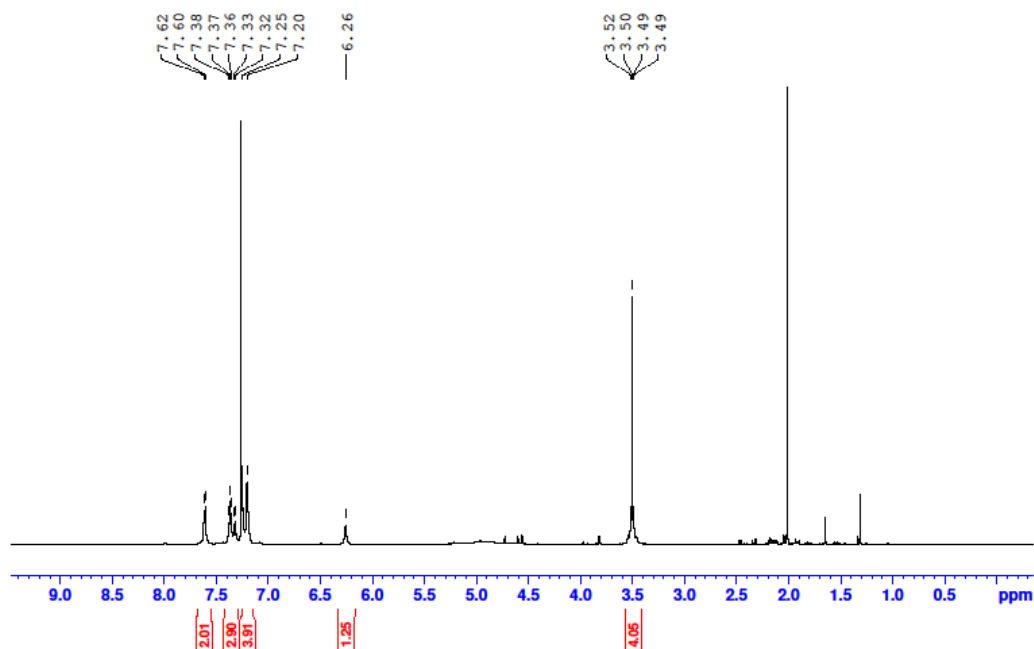

**Fig. 12:**  $^1\text{H}$ -NMR of partially  $^{13}\text{C}$  labeled phenguignardic acid (600 MHz,  $\text{CDCl}_3$ ).

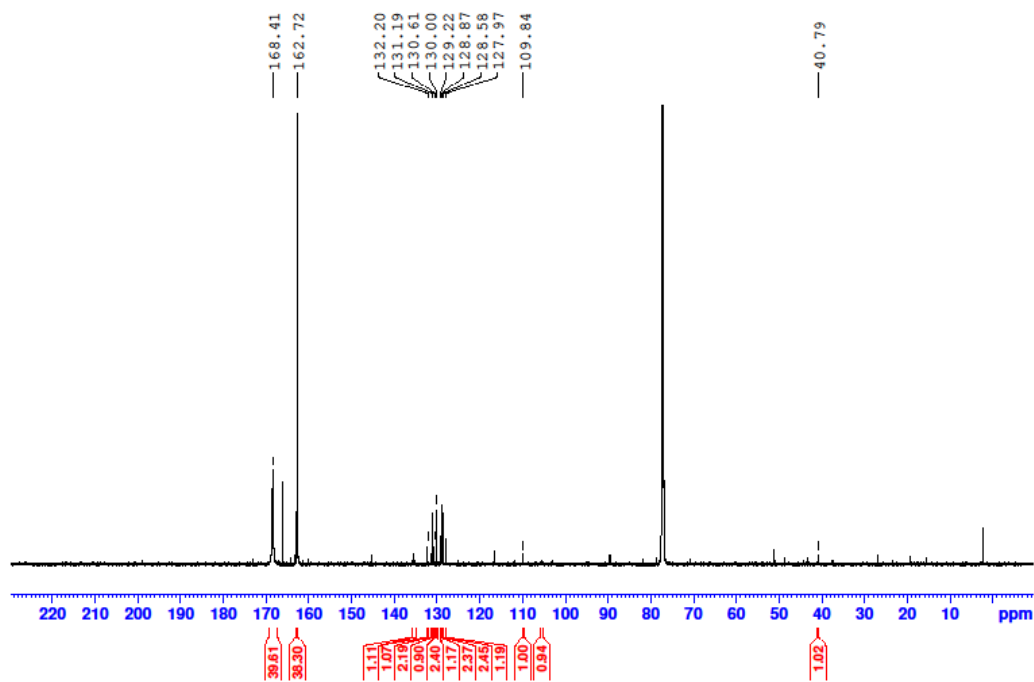

**Fig. 13:** I gated  $^{13}\text{C}$ -NMR of partially  $^{13}\text{C}$  labeled phenguignardic acid (151 MHz,  $\text{CDCl}_3$ ).
